# Supplementary material for: Poria cocos Lanostane Triterpenoids Extract Promotes Collagen and Hyaluronic Acid Production in D-Galactose-Induced Aging Rats
Source: MDPI journal article supplement (doi:10.3390/life13112130), 2023-10-28
Supplement: s1 [file s1]

## Supporting Information

# **Poria cocos lanostane triterpenoids extract Promote Collagen and Hyaluronic acid Production in D-Galactose-induced Aging Rats**

**Chien-Liang Chao<sup>1</sup>, Han-Peng Kuo<sup>2</sup>, Hsin-Wen Huang<sup>1</sup>, Maw-Yeun Cheng<sup>1</sup>, Hsin-Fan Chao<sup>1</sup>, Shih-Min Lu<sup>1</sup>, Hang-Ching Lin<sup>1,3</sup>, Chao-Jih Wang<sup>4</sup>, Tsu-Chung Chang<sup>5,\*</sup> and Chi-Rei Wu<sup>6,\*</sup>**

<sup>1</sup> Sinphar Pharmaceutical Co., Ltd., Sinphar group, Yilan 269, Taiwan;

<sup>2</sup> SynCore Biotechnology Co., Ltd., Sinphar group, Yilan 269, Taiwan;

<sup>3</sup> School of Pharmacy, National Defense Medical Center, Taipei 114, Taiwan;

<sup>4</sup> Sinphar Tian-Li Pharmaceutical Co., Ltd., Sinphar Group, Hangzhou 311100,

<sup>5</sup> Department of Biochemistry, National Defense Medical Center, Taipei 114, Taiwan;

<sup>6</sup> China Department of Chinese Pharmaceutical Sciences and Chinese Medicine Resources, China Medical University, Taichung 404, Taiwan.

## **1. The characteristics of Triterpenoid Compounds (1-6).**

**Table S1.**  $^1\text{H}$  NMR (400 MHz) and  $^{13}\text{C}$  (100 MHz) Spectroscopic Data for **1-6**.

## **2. Chromatogram of Triterpenoid Compounds (1-6) using UPLC/MS.**

**Figure S1.** The UPLC chromatogram of pachymic acid (**1**).

**Figure S2.** The ESI-MS spectrum of pachymic acid (**1**).

**Figure S3.** The UPLC chromatogram of dehydropachymic acid (**2**).

**Figure S4.** The ESI-MS spectrum of dehydropachymic acid (**2**).

**Figure S5.** The UPLC chromatogram of tumulosic acid (**3**).

**Figure S6.** The ESI-MS spectrum of tumulosic acid (**3**).

**Figure S7.** The UPLC chromatogram of dehydrotumulosic acid (**4**).

**Figure S8.** The ESI-MS spectrum of dehydrotumulosic acid (**4**).

**Figure S9.** The UPLC spectrum of polyporenic acid C (**5**).

**Figure S10.** The ESI-MS spectrum of polyporenic acid C (**5**).

**Figure S11.** The UPLC spectrum of 3-Epi-dehydrotumulosic acid (**6**).

**Figure S12.** The ESI-MS spectrum of 3-Epi-dehydrotumulosic acid (**6**).

## 1. The characteristics of Triterpenoid Compounds (1-6).

Pachymic Acid (**1**): white powder; ESI-MS  $m/z$ : 527.3822  $[M-H]^-$ ;  $^1H$  NMR (400 MHz, Pyridine- $d_5$ ) and  $^{13}C$ -NMR (100 MHz, Pyridine- $d_5$ ) data see Table S1.

Dehydropachymic Acid (**2**): white powder; ESI-MS  $m/z$ : 525.3657  $[M-H]^-$ ;  $^1H$  NMR (400 MHz, Pyridine- $d_5$ ) and  $^{13}C$ -NMR (100 MHz, Pyridine- $d_5$ ) data see Table S1.

Tumulolic Acid (**3**): white powder; ESI-MS  $m/z$ : 485.3635  $[M-H]^-$ ;  $^1H$  NMR (400 MHz, Pyridine- $d_5$ ) and  $^{13}C$ -NMR (100 MHz, Pyridine- $d_5$ ) data see Table S1.

Dehydrotumulolic Acid (**4**): white powder; ESI-MS  $m/z$ : 483.3475  $[M-H]^-$ ;  $^1H$  NMR (400 MHz, Pyridine- $d_5$ ) and  $^{13}C$ -NMR (100 MHz, Pyridine- $d_5$ ) data see Table S1.

Polyporenic Acid C (**5**): white powder; ESI-MS  $m/z$ : 481.3332  $[M-H]^-$ ;  $^1H$  NMR (400 MHz, Pyridine- $d_5$ ) and  $^{13}C$ -NMR (100 MHz, Pyridine- $d_5$ ) data see Table S1.

3-Epi-Dehydrotumulolic Acid (**6**): white powder; ESI-MS  $m/z$ : 483.3533  $[M-H]^-$ ;  $^1H$  NMR (400 MHz, Pyridine- $d_5$ ) and  $^{13}C$ -NMR (100 MHz, Pyridine- $d_5$ ) data see Table S1.



**Table S1.** <sup>1</sup>H NMR (400 MHz) and <sup>13</sup>C (100 MHz) Spectroscopic Data for **1-6**.

|     | <b>3</b>                               |                     |  | <b>5</b>                               |                     |  | <b>6</b>                               |                     |  | <b>4</b>                               |                     |
|-----|----------------------------------------|---------------------|--|----------------------------------------|---------------------|--|----------------------------------------|---------------------|--|----------------------------------------|---------------------|
| no. | $\delta_{\text{H}}$ multi<br>(J in Hz) | $\delta_{\text{C}}$ |  | $\delta_{\text{H}}$ multi<br>(J in Hz) | $\delta_{\text{C}}$ |  | $\delta_{\text{H}}$ multi<br>(J in Hz) | $\delta_{\text{C}}$ |  | $\delta_{\text{H}}$ multi<br>(J in Hz) | $\delta_{\text{C}}$ |
| 1   | 1.65 (br t, J=13)                      | 36.58 t             |  | 1.65 (td, J=14, 4.3);<br>2.09 (m)      | 36.8 t              |  | 2.26 (m); 1.72(br<br>d, J=12.4)        | 30.6 t              |  | 1.97 (m); 2.57<br>(m)                  | 36.74 t             |
| 2   | 1.88 (m) ; 1.96 (m)                    | 29.13 t             |  | 2.3; 2.75 (m)                          | 34.9 t              |  | 1.88 (dd, J=13.7,<br>8.4) 2.07 (m)     | 26.7 t              |  | 1.51 (m); 1.95<br>(m)                  | 29.14 t             |
| 3   | 3.43 (t, J=8.0)                        | 78.53 d             |  |                                        | 215.2 s             |  | 3.62 (s)                               | 75.1 d              |  | 3.48 (t, J=8.0)                        | 78.47 d             |
| 4   |                                        | 40.02 s             |  |                                        | 47.5 s              |  |                                        | 38.0 s              |  |                                        | 39.82 s             |
| 5   | 1.18 (d, J=3.8)                        | 51.42 d             |  | 1.59 (dd, J=11.5,<br>3.7)              | 51.0 d              |  | 2.01 (br t, J=8.3)                     | 43.7 d              |  | 1.32 (d, J=3.8)                        | 50.27 d             |
| 6   | 1.56 (m) ; 1.76 (m)                    | 19.21 t             |  | 1.96 (m); 2.13 (m)                     | 23.9 t              |  | 2.10 (m); 2.10 (m)                     | 23.4 t              |  | 2.16 (m)                               | 23.99 t             |
| 7   | 2.13 (m)                               | 27.47 t             |  | 5.57 (br d, J=6)                       | 120.7 d             |  | 5.62 (s)                               | 121.3 d             |  | 5.65 (br s)                            | 121.76 d            |
| 8   |                                        | 135.39 s            |  |                                        | 142.8 s             |  |                                        | 142.8 s             |  |                                        | 143.19 s            |
| 9   |                                        | 135.29 s            |  |                                        | 144.7 s             |  |                                        | 146.7 s             |  |                                        | 146.86 s            |
| 10  |                                        | 37.88 s             |  |                                        | 37.5 s              |  |                                        | 37.9 s              |  |                                        | 38.34 s             |
| 11  | 2.01 (m)                               | 21.46 t             |  | 5.35 (br d, J=5.6)                     | 117.7 d             |  | 5.46 (d, J=5.7)                        | 116.2 d             |  | 5.40 (br s)                            | 117.02 d            |
| 12  | 2.20 (d, J=12.5) ;<br>2.00 (m)         | 30.20 t             |  | 2.37; 2.67 (br d,<br>J=18.2)           | 36.3 t              |  | 2.64 (br d, J=15.6);<br>2.40 (m)       | 36.3 t              |  | 2.71 (d, J=12.5);<br>2.42 (m)          | 36.79 t             |
| 13  |                                        | 49.22 s             |  |                                        | 45.0 s              |  |                                        | 45.1 s              |  |                                        | 45.56 s             |
| 14  |                                        | 46.76 s             |  |                                        | 49.4 s              |  |                                        | 49.5 s              |  |                                        | 49.89 s             |
| 15  | 1.74 (d, J=13); 2.42<br>(dd, J=13, 8)  | 44.18 t             |  | 2.42; 1.91 (d, J=13)                   | 44.4 t              |  | 2.40 (m)                               | 44.5 t              |  | 1.74 (d, J=13);<br>2.42 (dd, J=13, 8)  | 44.92 t             |
| 16  | 4.56 (t, J=6.8)                        | 77.16 d             |  | 4.52 (t, J=7, 6.8)                     | 76.4 d              |  | 4.51 (t, J=7.2, 6.5)                   | 76.5 d              |  | 4.56 (t, J=6.8)                        | 76.91 d             |
| 17  | 2.80 (dd, J=11.1,                      | 57.79 d             |  | 2.86 (dd, J=11.2,                      | 57.6 d              |  | 2.85 (dd, J=11.1,                      | 57.6 d              |  | 2.92 (dd, J=11.1,                      | 58.12 d             |

|    |                                       |          |                     |         |                        |         |                                      |          |
|----|---------------------------------------|----------|---------------------|---------|------------------------|---------|--------------------------------------|----------|
|    | 5.9)                                  |          | 5.8)                |         | 5.7)                   |         | 5.9)                                 |          |
| 18 | 1.17 (s)                              | 18.28 q  | 1.04 (s)            | 17.6 q  | 1.08 (s)               | 17.7 q  | 1.09 (s)                             | 18.11 q  |
| 19 | 1.05 (s)                              | 19.42 q  | 1.12 (s)            | 22.0 q  | 1.09 (s)               | 23.0 q  | 1.09 (s)                             | 23.47 q  |
| 20 | 2.93 (m)                              | 49.28 d  | 2.94 (m)            | 48.5 d  | 2.94 (br t, J=9.5)     | 48.6 d  | 2.92 (m)                             | 49.03 d  |
| 21 |                                       | 179.49 s |                     | 178.7 s |                        | 178.7 s |                                      | 177.87 s |
| 22 | 2.66 (m) ; 2.50 (m)                   | 32.08 t  | 2.46 (m); 2.62 (m)  | 31.4 t  | 2.45 (m); 2.70 (m)     | 31.5 t  | 2.51 (m); 2.43 (m)                   | 31.94 t  |
| 23 | 2.41 (br t, J=12) ; 2.57 (br t, J=12) | 33.72 t  | 2.41 (m); 2.53 (m)  | 33.2 t  | 2.37; 2.52 (t, J=11.6) | 33.2 t  | 2.41 (br t, J=12); 2.53 (br t, J=12) | 33.69 t  |
| 24 |                                       | 156.58 s |                     | 156.0 s |                        | 156.1 s |                                      | 156.52 s |
| 25 | 2.30 (m)                              | 34.61 d  | 2.25 (m)            | 34.1 d  | 2.26 (m)               | 34.1 d  | 2.33 (m)                             | 34.58 d  |
| 26 | 0.97 (d, J=6.75)                      | 22.52 q  | 0.97 (dd, J=7.2)    | 22.0 q  | 0.96 (d, J=7)          | 22.0 q  | 1.01 (d, J=6.75)                     | 22.48 q  |
| 27 | 0.98 (d, J=6.75)                      | 22.38 q  | 0.99 (dd, J=7.2)    | 21.9 q  | 0.98 (d, J=7)          | 21.9 q  | 1.01 (d, J=6.75)                     | 22.34 q  |
| 28 | 1.23 (s)                              | 29.15 q  | 1.12 (s)            | 25.7 q  | 1.18 (s)               | 29.2 q  | 1.23 (s)                             | 29.31 q  |
| 29 | 1.06 (s)                              | 16.87 q  | 1.04 (s)            | 22.4 q  | 0.98 (s)               | 23.2 q  | 1.15 (s)                             | 17.12 q  |
| 30 | 1.47 (s)                              | 25.94 q  | 1.44 (s)            | 26.4 q  | 1.42 (s)               | 26.6 q  | 1.53 (s)                             | 27.08 q  |
| 31 | 4.83 (s) ; 4.97 (s)                   | 107.01 t | 4.83 (s) ; 4.97 (s) | 107.5 t | 4.83 (s); 5.02 (s)     | 107.1 t | 4.86 (s); 5.00 (s)                   | 107.51 t |

|     | 1                                      |                     | 2                                      |                     |
|-----|----------------------------------------|---------------------|----------------------------------------|---------------------|
| no. | $\delta_{\text{H}}$ multi<br>(J in Hz) | $\delta_{\text{C}}$ | $\delta_{\text{H}}$ multi<br>(J in Hz) | $\delta_{\text{C}}$ |
| 1   | 1.11 (m)<br>1.60 (br t, J=13)          | 35.3 t              | 1.42 (m); 1.89 (m)                     | 35.5 t              |
| 2   | 1.60 (m)<br>1.69 (m)                   | 24.5 t              | 1.77(m); 1.68 (m)                      | 24.5 t              |
| 3   | 4.66 (dd, J=11.6,<br>4.4)              | 80.6 d              | 4.70 (dd, J=12, 4)                     | 80.6 d              |
| 4   |                                        | 38.0 s              |                                        | 37.8 s              |
| 5   | 1.14 (m)                               | 50.7 d              | 1.25 (dd)                              | 49.5 d              |
| 6   | 1.52 (m)                               | 18.4 t              | 2.05 (m); 2.05 (m)                     | 23.0 t              |
| 7   | 2.10 (m); 2.10 (m)                     | 26.7 t              | 5.55 (br, s)                           | 120.7 d             |
| 8   |                                        | 135.0 s             |                                        | 142.7 s             |
| 9   |                                        | 134.4 s             |                                        | 145.7 s             |
| 10  |                                        | 37.1 s              |                                        | 37.5 s              |
| 11  | 1.92 (m); 1.90 (m)                     | 20.9 t              | 5.28 (d, J=5.6)                        | 116.9 d             |
| 12  | 2.26 (t, J=6.7); 2.00<br>(m)           | 29.6 t              | 2.68; 2.42 (br d,<br>J=18)             | 36.2 t              |
| 13  |                                        | 48.8 s              |                                        | 45.0 s              |
| 14  |                                        | 46.2 s              |                                        | 49.3 s              |
| 15  | 1.69 (d, J=13)<br>2.37 (dd, J=13, 9)   | 43.6 t              | 2.42; 1.92 (d, J=13)                   | 44.3 t              |
| 16  | 4.51 (t, J=6.8, 6.4 )                  | 77.6 d              | 4.50 (t, J=8, 6.8)                     | 76.4 d              |
| 17  | 2.80 (dd, J=10.8,                      | 57.3 d              | 2.87 (dd, J=11.2,                      | 57.5 d              |

|    |                                        |         |                      |         |
|----|----------------------------------------|---------|----------------------|---------|
|    | 6.4)                                   |         | 5.8)                 |         |
| 18 | 1.12 (s)                               | 17.8 q  | 1.02 (s)             | 17.6 q  |
| 19 | 0.94 (s)                               | 19.2 q  | 0.98 (s)             | 21.0 q  |
| 20 | 2.93 (m)                               | 48.8 d  | 2.92 (m)             | 48.5 d  |
| 21 |                                        | 178.8 s |                      | 178.7 s |
| 22 | 2.63(m)<br>2.47 (m)                    | 31.6 t  | 2.51 (m); 2.64 (m)   | 31.4 t  |
| 23 | 2.40 (br t, J=12)<br>2.53 (br t, J=12) | 33.2 t  | 2.40 (m); 2.54 (m)   | 33.2 t  |
| 24 |                                        | 156.1 s |                      | 156.0 s |
| 25 | 2.27 (m)                               | 34.1 d  | 2.28 (m)             | 34.0 d  |
| 26 | 0.97 (d, J=6.8)                        | 22.0 q  | 0.96 (dd, J=7)       | 22.0 q  |
| 27 | 0.99 (d, J=6.8)                        | 21.9 q  | 0.97 (dd, J=7)       | 21.8 q  |
| 28 | 0.89 (s)                               | 28.0 q  | 0.86 (s)             | 28.1 q  |
| 29 | 0.91 (s)                               | 16.8 q  | 0.96 (s)             | 17.1 q  |
| 30 | 1.47 (s)                               | 25.4 q  | 1.46 (s)             | 26.5 q  |
| 31 | 4.83 (s)<br>4.96 (s)                   | 107.0 t | 4.82 (s)<br>4.96 (s) | 107.0 t |





## 2. Chromatogram of Triterpenoid Compounds (1-6) using UPLC/MS.

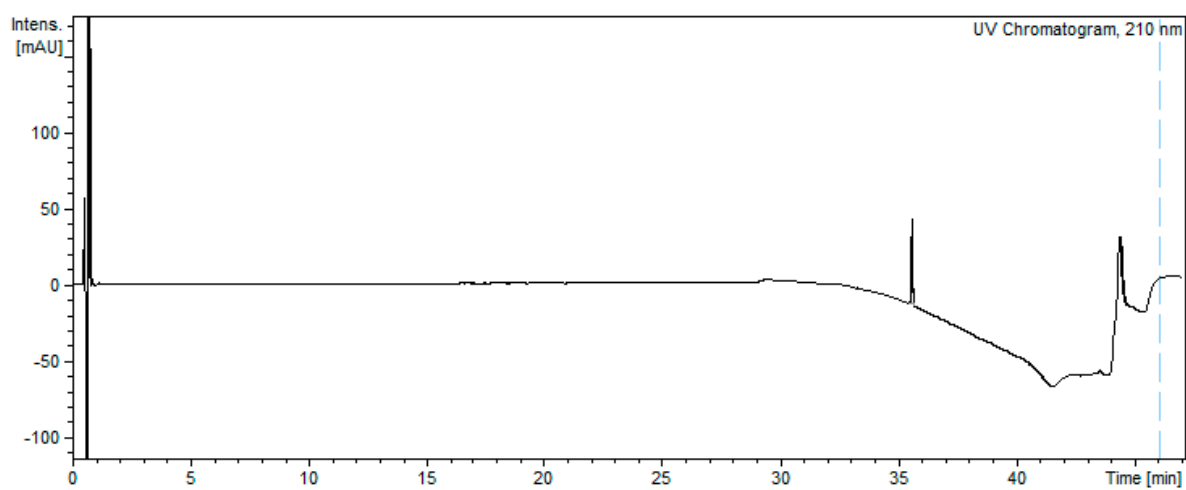

**Figure S1.** The UPLC chromatogram of pachymic acid (**1**).

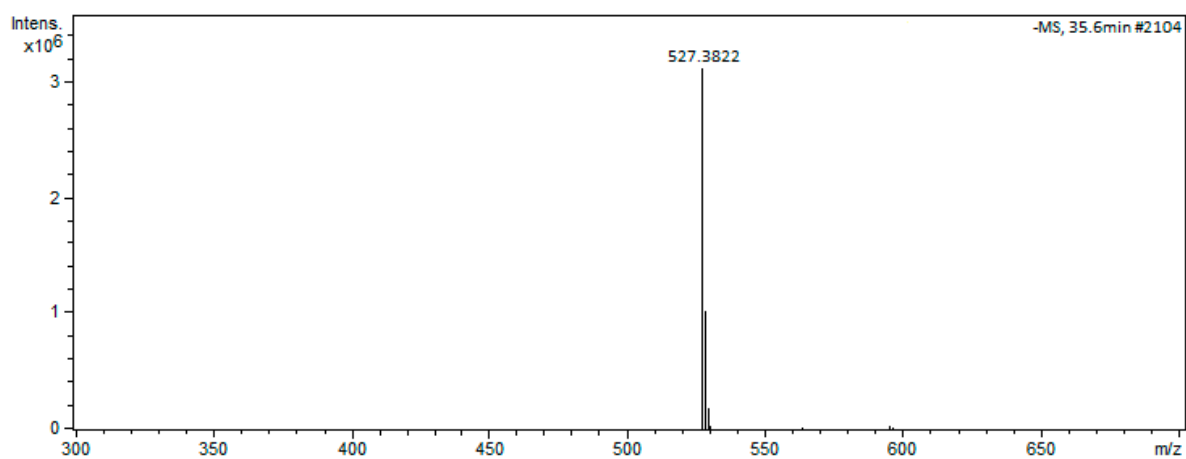

**Figure S2.** The ESI-MS spectrum of pachymic acid (**1**).

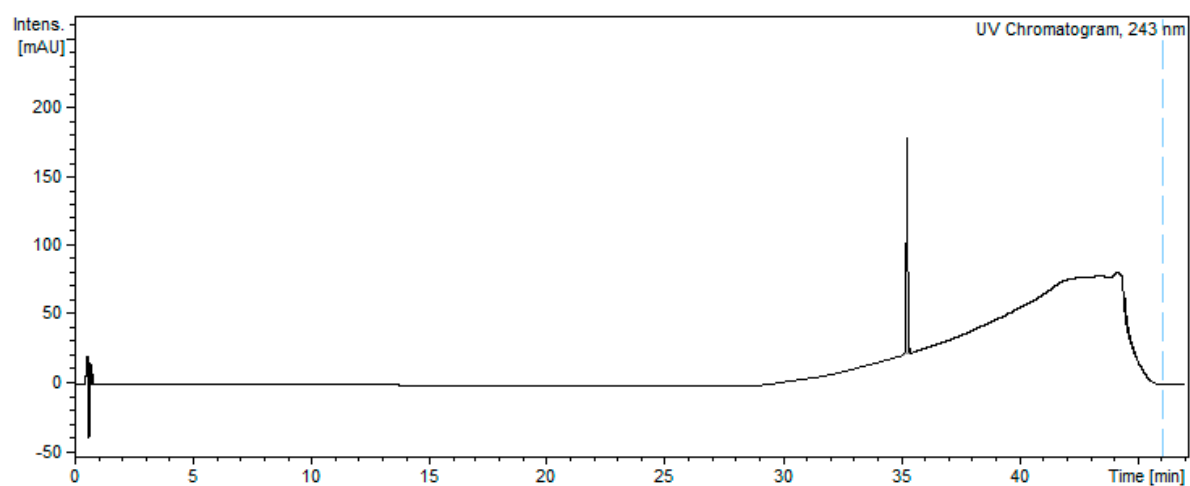

**Figure S3.** The UPLC chromatogram of dehydropachymic acid (**2**).

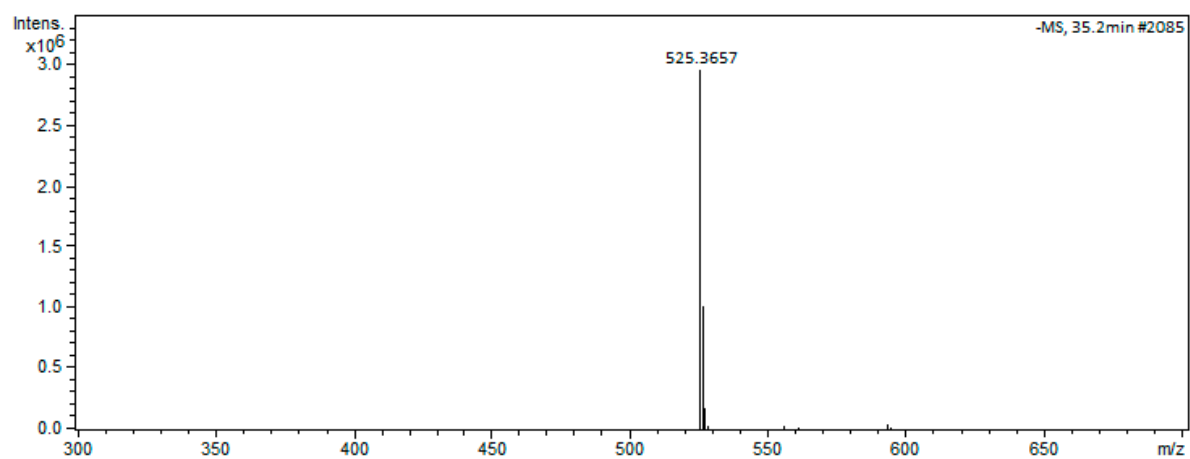

**Figure S4.** The ESI-MS spectrum of dehydropachymic acid (**2**).

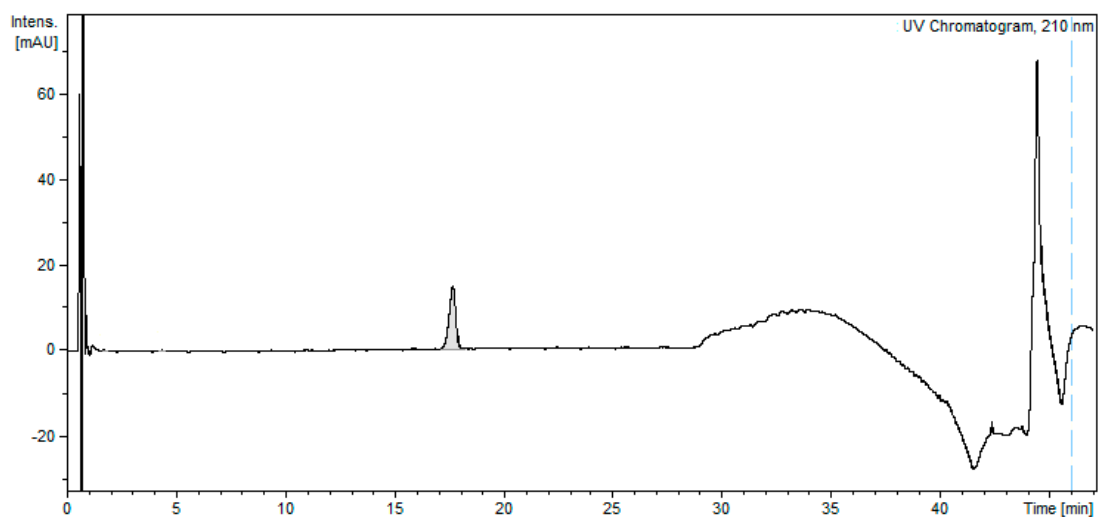

**Figure S5.** The UPLC chromatogram of tumulosic acid (3).

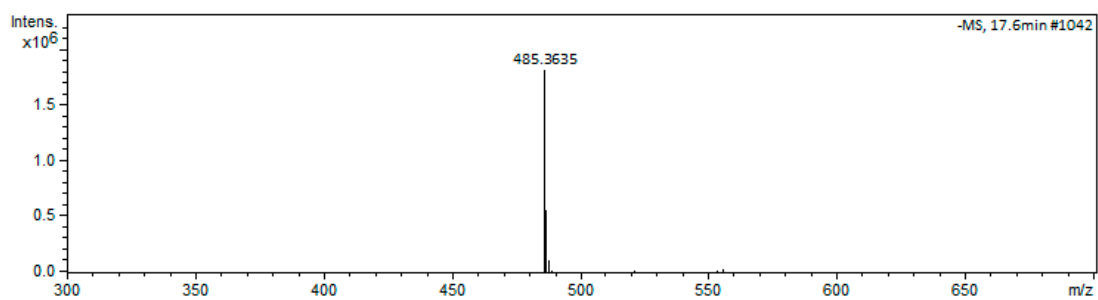

**Figure S6.** The ESI-MS spectrum of tumulosic acid (3).

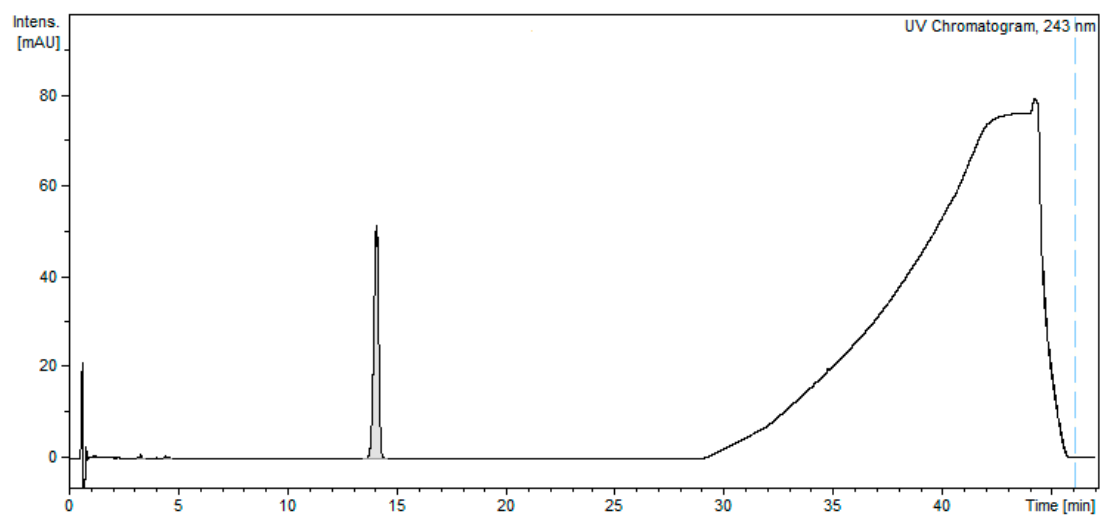

**Figure S7.** The UPLC chromatogram of dehydrotumulosic acid (4).

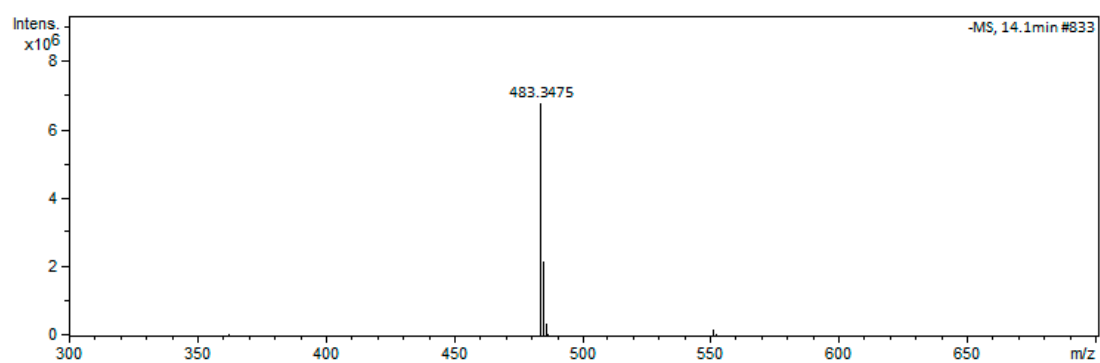

**Figure S8.** The ESI-MS spectrum of dehydrotumulosic acid (4).

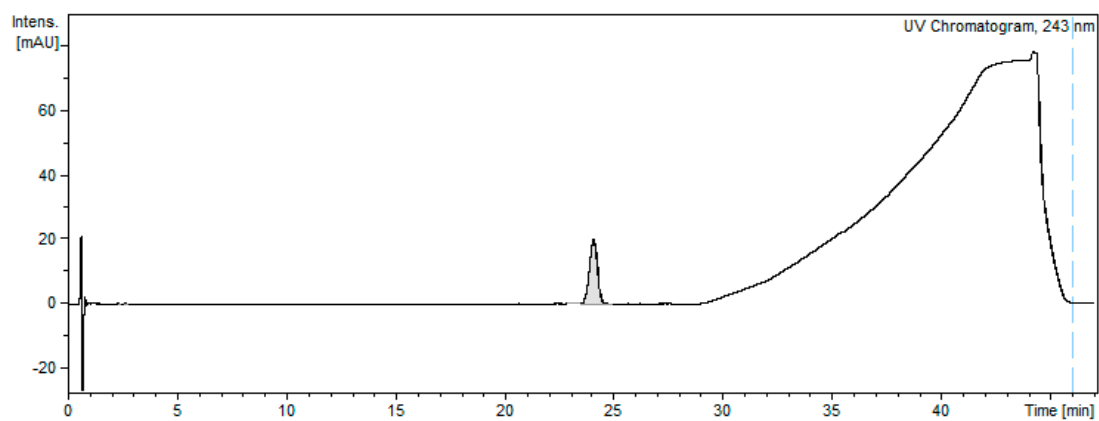

**Figure S9.** The UPLC chromatogram of polyporenic acid C (5).

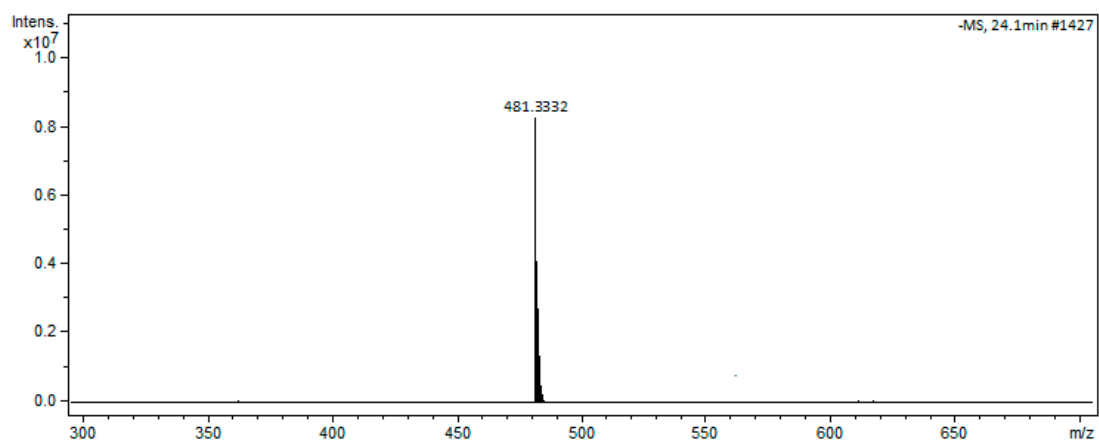

**Figure S10.** The ESI-MS spectrum of polyporenic acid C (5).

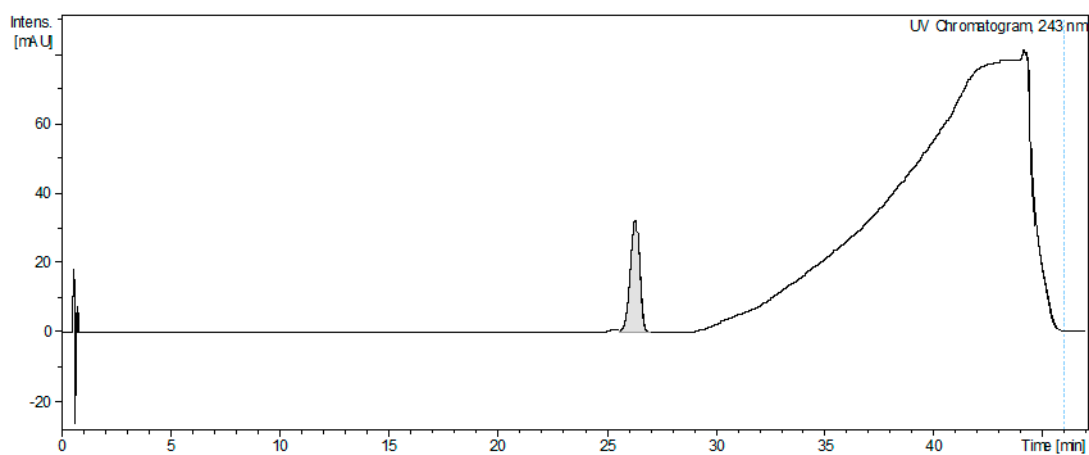

**Figure S11.** The UPLC chromatogram of 3-epi-dehydrotumulosic acid (**6**).

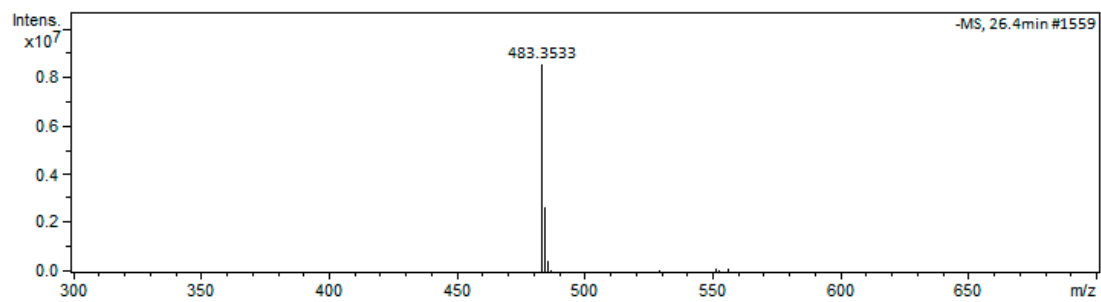

**Figure S12.** The ESI-MS spectrum of 3-epi-dehydrotumulosic acid (**6**).
